# Supplementary material for: Etching-induced ion exchange engineering of two-dimensional layered NiFeCo-based hydroxides for high energy charge storage
Source: Royal Society of Chemistry journal article supplement (doi:10.1039/d3dt03712f), 2023-12-20
Supplement: d3dt03712f1.pdf [file d3dt03712f1.pdf]

# Etch-Induced Ion Exchange Engineering of Two-Dimensional Layered NiFeCo-Based Hydroxides for High-Energy Charge Storage

a. Chenhan Xiong <sup>a,#</sup>, Wei Cao <sup>a,#</sup>, Qiang Long <sup>a</sup>, Jiaqi Chen <sup>a</sup>, Yanqiu Yu <sup>a</sup>, Xinming Lian <sup>a</sup>, Jianhua Huang <sup>b,c</sup>, Guoping Du <sup>a</sup>, Nan Chen <sup>a,\*</sup>

b. School of Materials Science and Engineering, Nanchang University, Nanchang 330031, China

# These authors (C. Xiong and W.Cao) contributed equally to this article.

\* Corresponding authors, emails: [nanchen@ncu.edu.cn](mailto:nanchen@ncu.edu.cn) (NC)

## Figure Captions and Video

**Fig. S1** Photographic images of the beginning and ending of the electrochemical synthesis process, and of pure NF, NF after etching treatment, and NF after electrochemical synthesis.

**Fig. S2** Photographic images of pre-treatment pure NF (a), Ni/NF (b), Ni<sub>1</sub>Fe<sub>0.1</sub>/NF (c), Ni<sub>1</sub>Fe<sub>0.3</sub>/NF (cd) and Ni<sub>1</sub>Fe<sub>0.5</sub>/NF (e).

**Fig. S3** SEM images of pure NF (a, b), Ni/NF (c, d), Ni<sub>1</sub>Fe<sub>0.1</sub>/NF (e, f), Ni<sub>1</sub>Fe<sub>0.3</sub>/NF (g, h) and Ni<sub>1</sub>Fe<sub>0.5</sub>/NF (g, h).

**Fig. S4** SEM image (a) and XRD pattern (b) of the pretreated NF.

**Fig. S5** XRD patterns of the series of electrochemical in situ grown electrodes.

**Fig. S6** (a) CV and (b) GCD curves of the series of electrodes at a scan rate of 10 mV s<sup>-1</sup> and a current density of 2 mA cm<sup>-2</sup>, respectively. (c) CV curves of Ni<sub>1</sub>Fe<sub>0.5</sub>/NF electrode with scan rates from 2 to 50 mV s<sup>-1</sup>, (d) GCD curves of Ni<sub>1</sub>Fe<sub>0.5</sub>/NF electrode with current densities from 2 to 10 mA cm<sup>-2</sup>. (e) Specific capacity of the series of electrodes at various current densities.

**Fig. S7** Series of electrode CV and GCD curves with scan rates from 2 to 50 mV s<sup>-1</sup> and current density from 2 to 10 mA cm<sup>-2</sup>, (a, e) Ni/NF, (b, f) Ni<sub>1</sub>Fe<sub>0.1</sub>/NF, (c, g) Ni<sub>1</sub>Fe<sub>0.3</sub>/NF and (d, h) Ni<sub>1</sub>Fe<sub>0.5</sub>/NF.

**Fig. S8** Series of electrode CV and GCD curves with scan rates from 2 to 50 mV s<sup>-1</sup> and current density from 2 to 10 mA cm<sup>-2</sup>, (a, d) Ni<sub>1</sub>(Fe/Co=2/1)<sub>0.5</sub>/NF, (b, e) Ni<sub>1</sub>(Fe/Co=1/2)<sub>0.5</sub>/NF and (c, f) Ni<sub>1</sub>Co<sub>0.5</sub>/NF.

**Fig. S9** (a) Photographic images of the beginning and ending of the electrochemical synthesis process for untreated NF, (b) SEM image, (c) XRD pattern, (d) CV and (e) GCD curves.

**Fig. S10** XPS of the pretreated NiFeCo/NF.

**Fig. S11** Cycling performances of the series of electrodes.

**Fig. S12** SEM images of (a) before cycling test, and (b) after cycling test, with (c) TEM image and (d) SAED pattern of after cycling test.

**Fig. S13** Negative electrode (a) CV curves with the scan rates from 2 to 100  $\text{mV s}^{-1}$ , and (b) GCD curves with the current density from 1 to 10  $\text{mA cm}^{-2}$ .

**Fig. S14** CV curves of  $\text{Ni}_1(\text{Fe/Co}=1/1)_{0.5}/\text{NF}$  and AC electrodes at the scan rate of 10  $\text{mV s}^{-1}$ .

**Fig. S15** Photographic image of  $\text{Ni}_1(\text{Fe/Co}=1/1)_{0.5}/\text{NF} // \text{AC}$  HSC device driving LED lamp combination.

**Video. S1** A typical video recording process of in situ electrochemical synthesis of transition metal-based hydroxides on NF ( $\text{Ni}_1(\text{Fe/Co}=1/1)_{0.5}/\text{NF}$ ).

**Table. S1** Comparison of electrochemical performance of related literature on transition metal-based hydroxides electrodes.

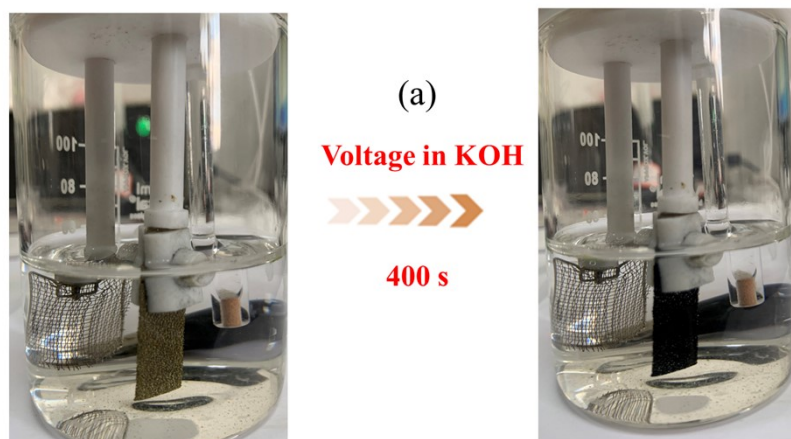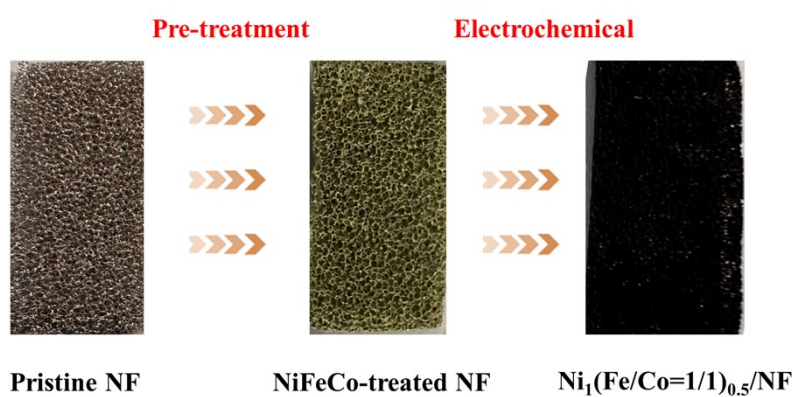

**Fig. S1** Photographic images of the beginning and ending of the electrochemical synthesis process, and of pure NF, NF after etching treatment, and NF after electrochemical synthesis.

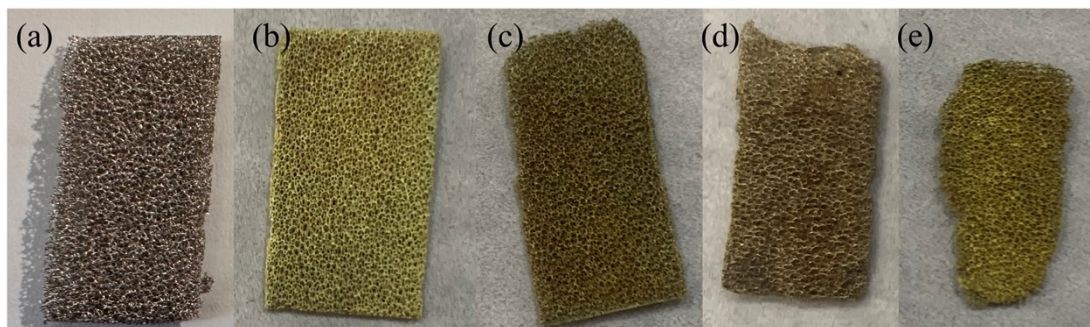

**Fig. S2** Photographic images of pre-treatment pure NF (a), Ni/NF (b),  $\text{Ni}_1\text{Fe}_{0.1}/\text{NF}$  (c),  $\text{Ni}_1\text{Fe}_{0.3}/\text{NF}$  (cd) and  $\text{Ni}_1\text{Fe}_{0.5}/\text{NF}$  (e).

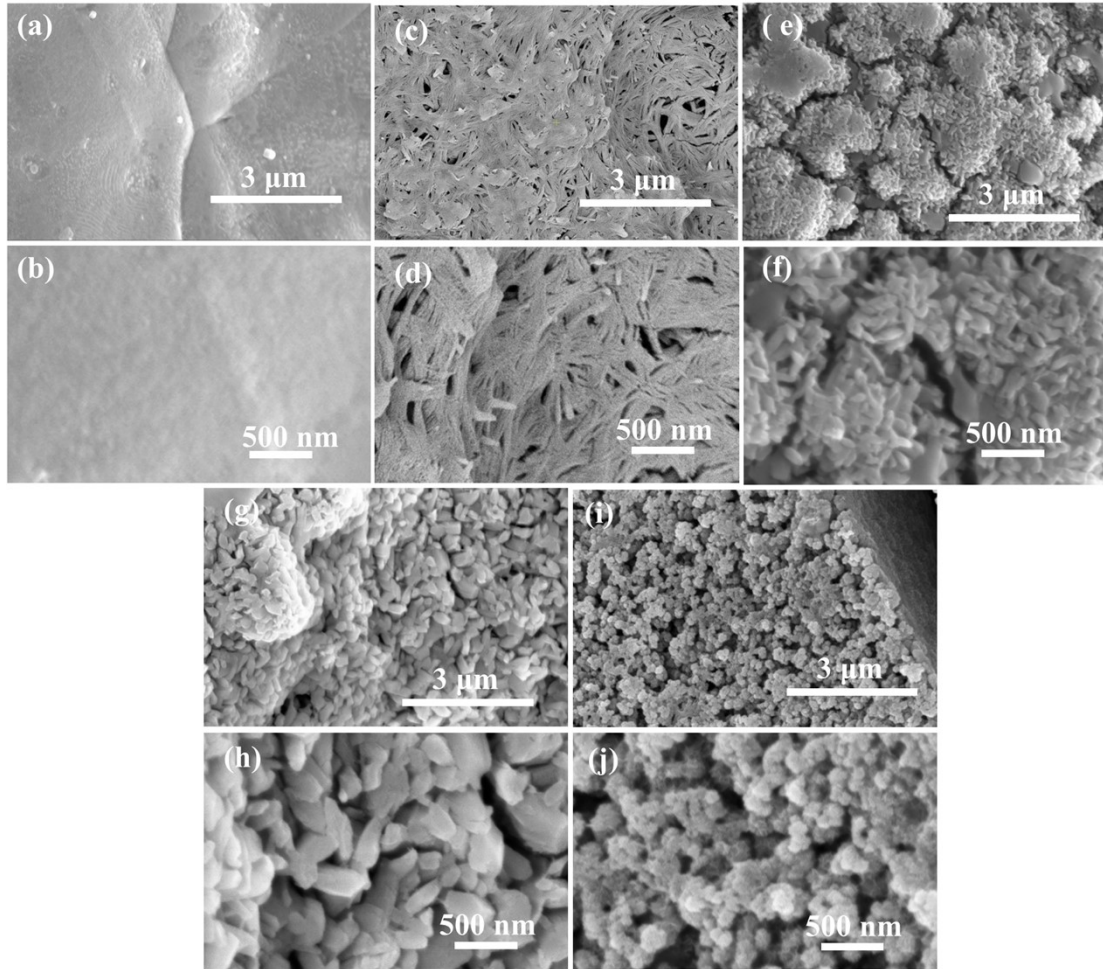

**Fig. S3** SEM images of pure NF (a, b), Ni/NF (c, d), Ni<sub>1</sub>Fe<sub>0.1</sub>/NF (e, f), Ni<sub>1</sub>Fe<sub>0.3</sub>/NF (g, h) and Ni<sub>1</sub>Fe<sub>0.5</sub>/NF (i, j).

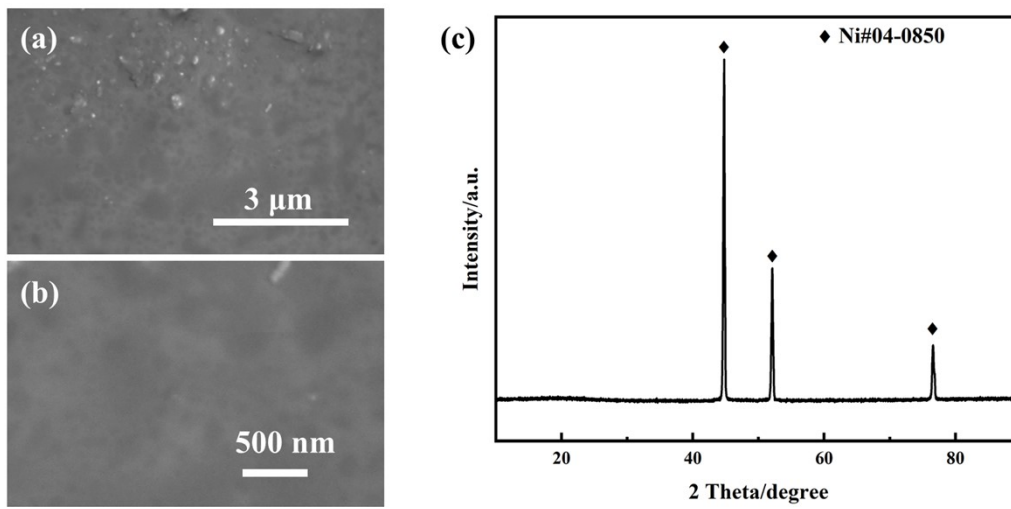

**Fig. S4** SEM image (a) and XRD pattern (b) of the pretreated NF.

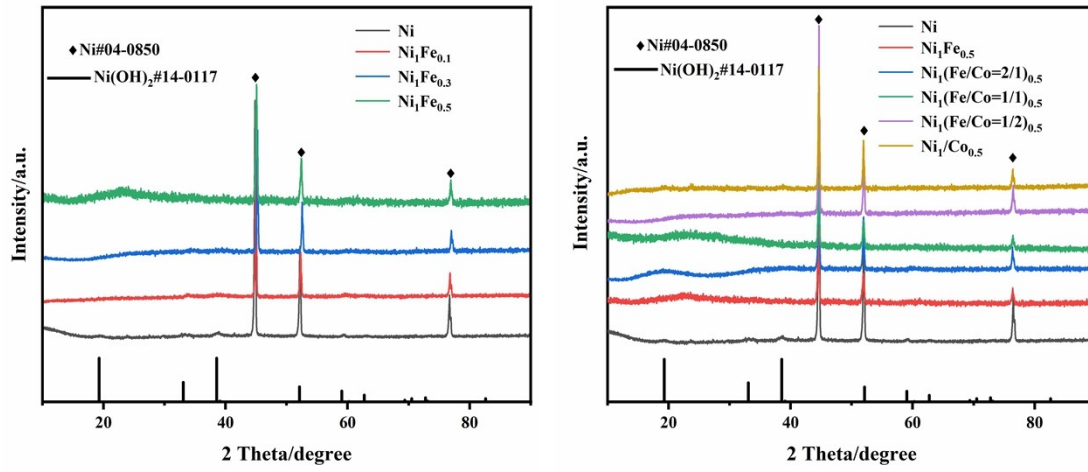

**Fig. S5** XRD patterns of the series of electrochemical in situ grown electrodes.



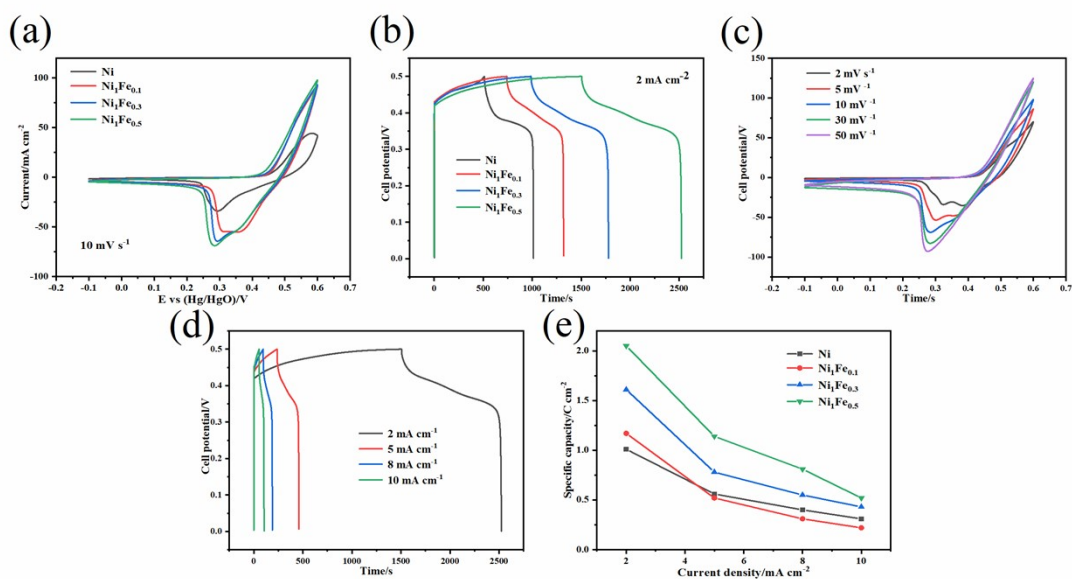

**Fig. S6** (a) CV and (b) GCD curves of the series of electrodes at a scan rate of 10 mV s<sup>-1</sup> and a current density of 2 mA cm<sup>-2</sup>, respectively. (c) CV curves of Ni<sub>1</sub>Fe<sub>0.5</sub>/NF electrode with scan rates from 2 to 50 mV s<sup>-1</sup>, (b) GCD curves of Ni<sub>1</sub>Fe<sub>0.5</sub>/NF electrode with current densities from 2 to 10 mA cm<sup>-2</sup>. (e) Specific capacity of the series of electrodes at various current densities.

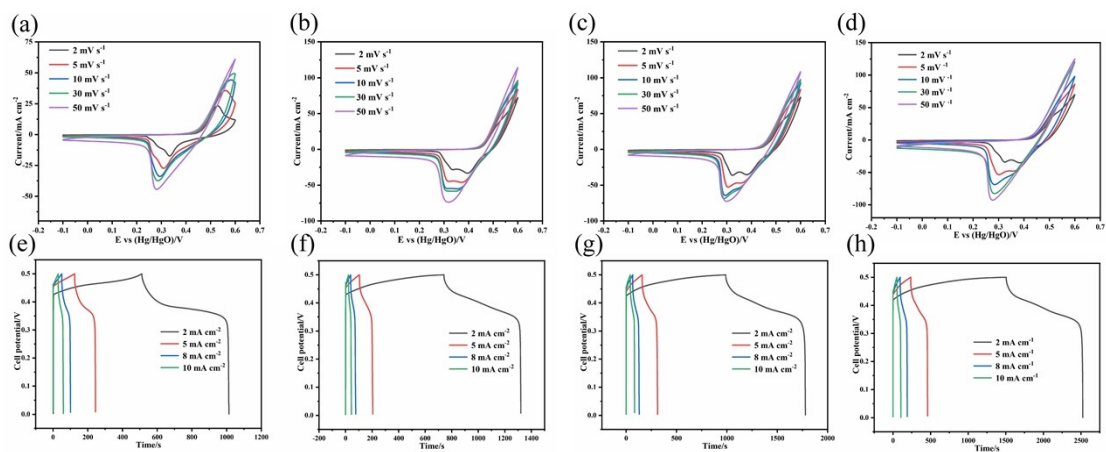

**Fig. S7** Series of electrode CV and GCD curves with scan rates from 2 to 50  $\text{mV s}^{-1}$  and current density from 2 to 10  $\text{mA cm}^{-2}$ , (a, e) Ni/NF, (b, f)  $\text{Ni}_1\text{Fe}_{0.1}/\text{NF}$ , (c, g)  $\text{Ni}_1\text{Fe}_{0.3}/\text{NF}$  and (d, h)  $\text{Ni}_1\text{Fe}_{0.5}/\text{NF}$ .

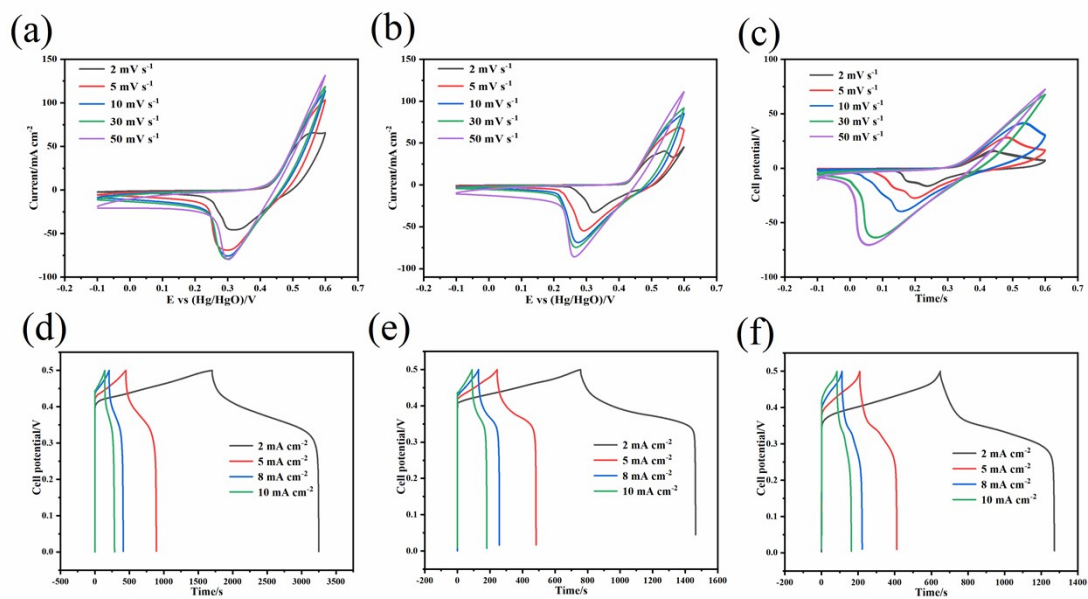

**Fig. S8** Series of electrode CV and GCD curves with scan rates from 2 to 50  $\text{mV s}^{-1}$  and current density from 2 to 10  $\text{mA cm}^{-2}$ , (a, d)  $\text{Ni}_1(\text{Fe}/\text{Co}=2/1)_{0.5}/\text{NF}$ , (b, e)  $\text{Ni}_1(\text{Fe}/\text{Co}=1/2)_{0.5}/\text{NF}$  and (c, f)  $\text{Ni}_1\text{Co}_{0.5}/\text{NF}$ .

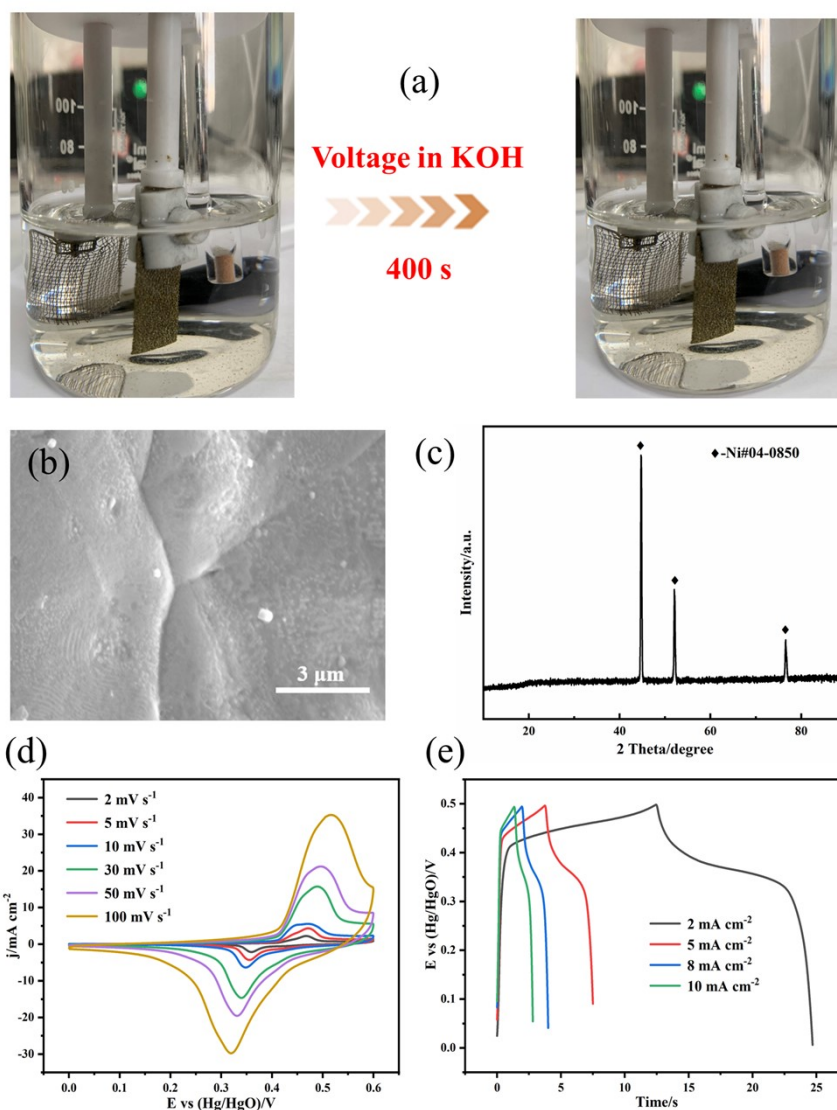

**Fig. S9** (a) Photographic images of the beginning and ending of the electrochemical synthesis process for unpretreated NF, (b) SEM image, (c) XRD pattern, (d) CV and (e) GCD curves.

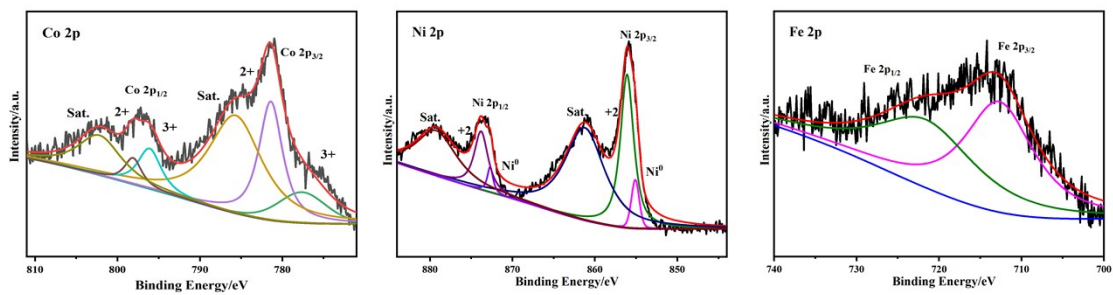

**Fig. S10** XPS of the pretreated NiFeCo/NF.

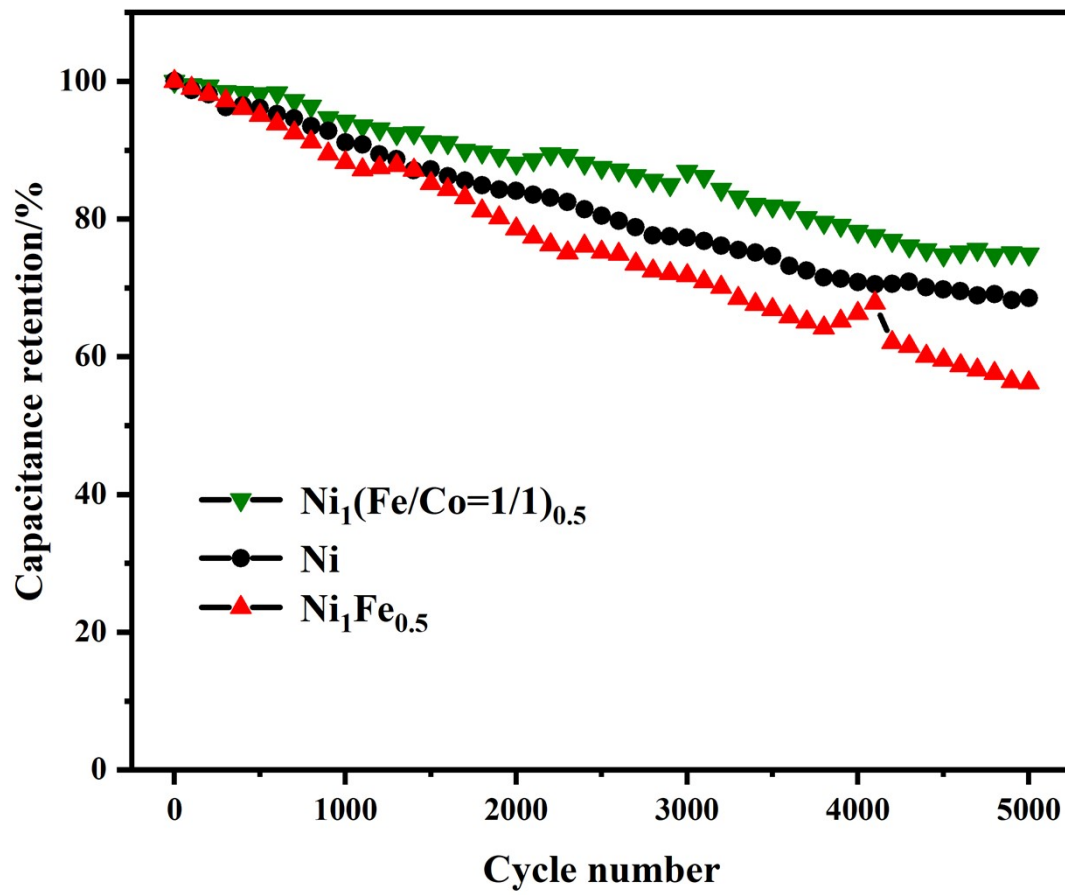

Fig. S11 Cycling performances of the series of electrodes.

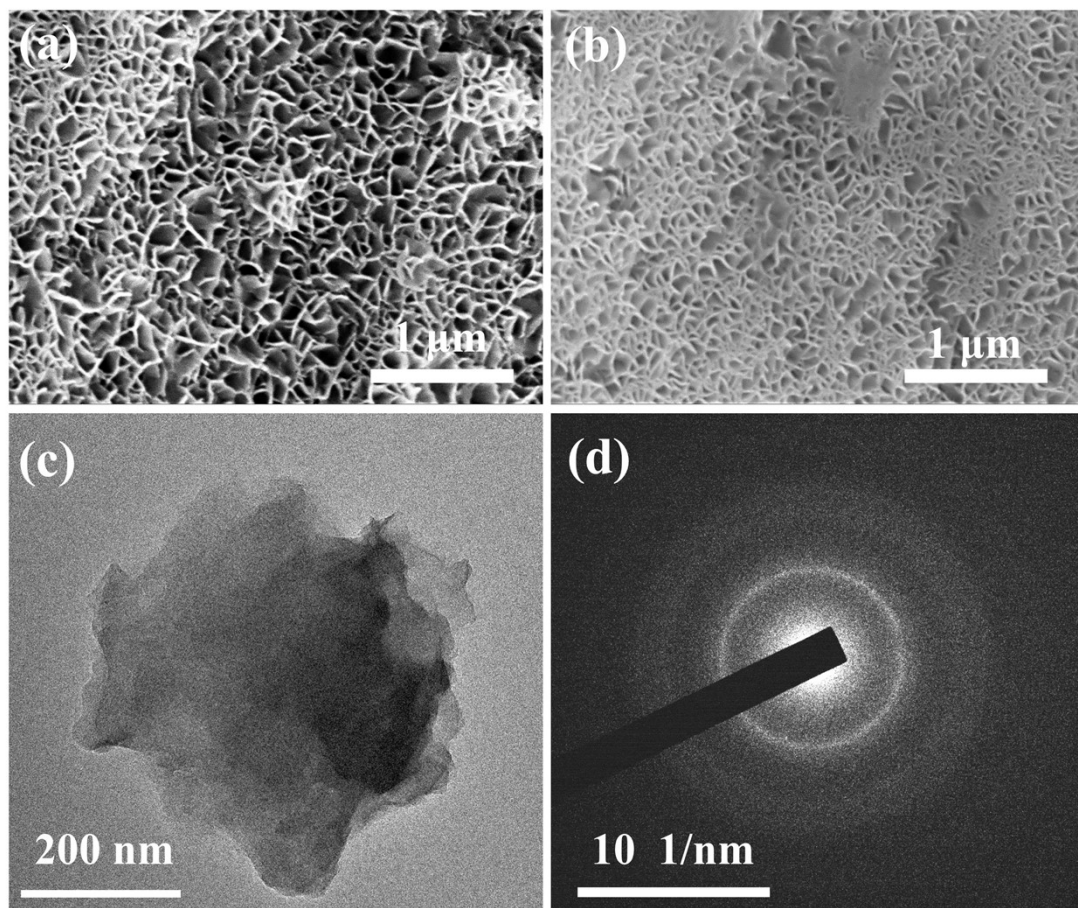

**Fig. S12** SEM images of (a) before cycling test, and (b) after cycling test, with (c) TEM image and (d) SAED pattern of after cycling test.

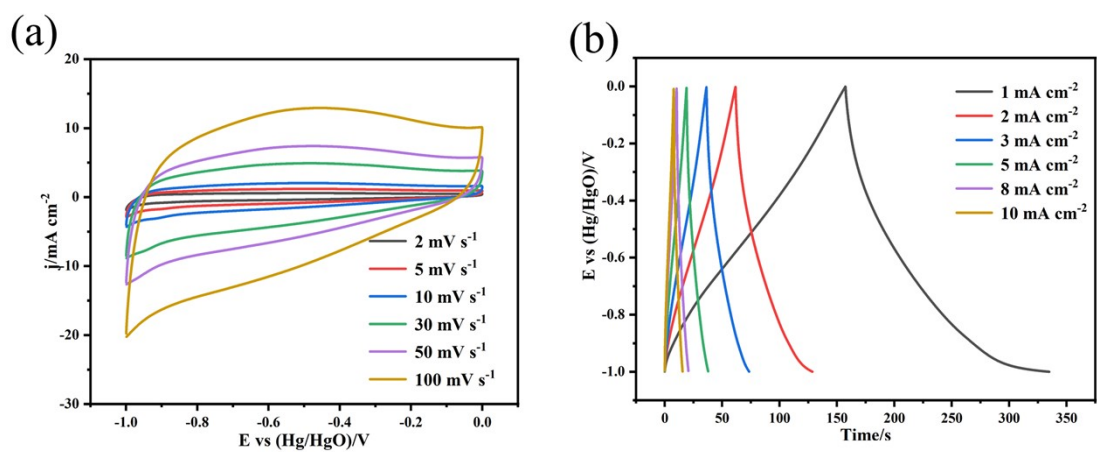

**Fig. S13** Negative electrode (a) CV curves with the scan rates from 2 to 100  $\text{mV s}^{-1}$ , and (b) GCD curves with the current density from 1 to 10  $\text{mA cm}^{-2}$ .



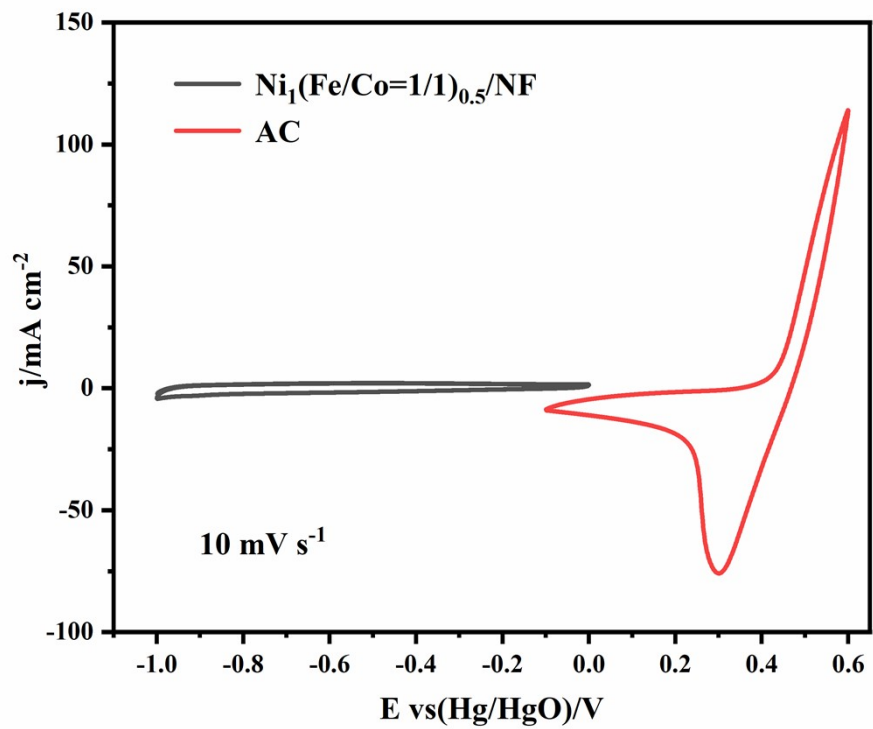

**Fig. S14** CV curves of  $\text{Ni}_1(\text{Fe/Co}=1/1)_{0.5}/\text{NF}$  and AC electrodes at the scan rate of 10

mV

$\text{s}^{-1}$ .

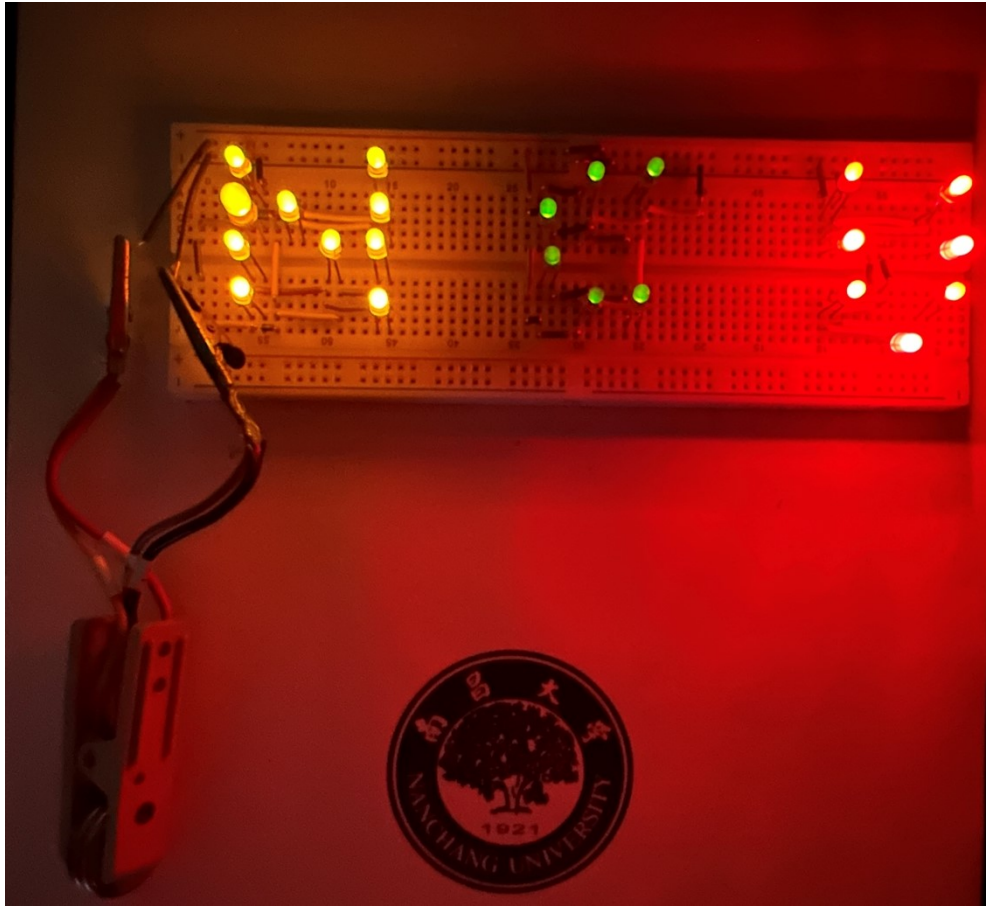

**Fig. S15** Photographic image of  $\text{Ni}_1(\text{Fe}/\text{Co}=1/1)_{0.5}/\text{NF} // \text{AC}$  HSC device driving LED lamp combination.

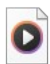

a75be05c6dc9f7  
50065fa2249fdbt

**Video. S1** A typical video recording process of in situ electrochemical synthesis of transition metal-based hydroxides on NF ( $\text{Ni}_1(\text{Fe}/\text{Co}=1/1)_{0.5}/\text{NF}$ ).

**Table. S1** Comparison of electrochemical performance of related literature on transition metal-based hydroxides electrodes.

| Electrode materials                               | Technical route/synthesis time                   | Specific capacitance                                       | Current density        | Ref.      |
|---------------------------------------------------|--------------------------------------------------|------------------------------------------------------------|------------------------|-----------|
| NC LDH NSs@Ag@CC                                  | Two-step method/High temperature for a long time | 1111.7 F cm <sup>-2</sup><br>(502.9 mC cm <sup>-2</sup> )  | 2 mA cm <sup>-2</sup>  | [1]       |
| Co <sub>9</sub> S <sub>8</sub> /PPy/NiCo-LDH NTAs | Three-step method/19 h                           | 2.65 F cm <sup>-2</sup><br>(1325 mC cm <sup>-2</sup> )     | 1 mA cm <sup>-2</sup>  | [2]       |
| NiCo-LDH/Mn <sub>3</sub> O <sub>4</sub>           | Two-step method/25 min                           | 1.86 C cm <sup>-2</sup>                                    | 1 mA cm <sup>-2</sup>  | [3]       |
| H-NiCo LDH/ACC                                    | Two-step method/25 h                             | 1377 mC cm <sup>-2</sup>                                   | 1 mA cm <sup>-2</sup>  | [4]       |
| NiO@MnO <sub>2</sub>                              | Two-step method/26 h                             | 119.4 F cm <sup>-2</sup><br>(83.6 mC cm <sup>-2</sup> )    | 2 mA cm <sup>-2</sup>  | [5]       |
| Co-Ni LDH-CC-CNT                                  | Three--step method/3 h                           | 1979.2 F cm <sup>-2</sup><br>(1187.5 mC cm <sup>-2</sup> ) | 1 mA cm <sup>-2</sup>  | [6]       |
| Ni(OH) <sub>2</sub> NTAs                          | Two-step method/5 h                              | 315 F cm <sup>-2</sup><br>(157.5 mC cm <sup>-2</sup> )     | 18 mA cm <sup>-2</sup> | [7]       |
| Ni <sub>1</sub> (Fe/Co=1/1) <sub>0.5</sub> /NF    | One-step method/400 s                            | 2.32 C cm <sup>-2</sup>                                    | 2 mA cm <sup>-2</sup>  | This work |

Note: The purpose of the technical route/synthesis time listed in Table. S1 is to reflect efficiency of the strategy proposed in this work. In particular, the technical route refers to the steps required for the synthesis of materials reported in the literature, and the synthesis time refers to the sum of time spent in the synthesis stage of materials.

## References

- [1] S. C. Sekhar, G. Nagaraju, and J. S. Yu, "Conductive silver nanowires-fenced carbon cloth fibers-supported layered double hydroxide nanosheets as a flexible and binder-free electrode for high-performance asymmetric supercapacitors," *Nano Energy*, vol. 36, pp. 58-67, 2017.
- [2] L. Wang, S. Li, F. Huang, X. Yu, M. Liu, and H. Zhang, "Interface modification of hierarchical  $\text{Co}_9\text{S}_8@\text{NiCo}$  layered dihydroxide nanotube arrays using polypyrrole as charge transfer layer in flexible all-solid asymmetric supercapacitors," *Journal of Power Sources*, vol. 439, 2019.
- [3] N. Zhao *et al.*, "Preparation of partially-cladding  $\text{NiCo-LDH}/\text{Mn}_3\text{O}_4$  composite by electrodeposition route and its excellent supercapacitor performance," *Journal of Alloys and Compounds*, vol. 796, pp. 111-119, 2019.
- [4] X. Xuan *et al.*, "In-situ growth of hollow  $\text{NiCo}$  layered double hydroxide on carbon substrate for flexible supercapacitor," *Electrochimica Acta*, vol. 321, 2019.
- [5] X. Liu, J. Wang, and G. Yang, "Amorphous nickel oxide and crystalline manganese oxide nanocomposite electrode for transparent and flexible supercapacitor," *Chemical Engineering Journal*, vol. 347, pp. 101-110, 2018.
- [6] C. Xu, X. Kong, S. Zhou, B. Zheng, F. Huo, and M. Strømme, "Interweaving metal-organic framework-templated  $\text{Co-Ni}$  layered double hydroxide nanocages with nanocellulose and carbon nanotubes to make flexible and foldable electrodes for energy storage devices," *Journal of Materials Chemistry A*, vol. 6, no. 47, pp. 24050-24057, 2018.
- [7] C. Shi, J. Sun, Y. Pang, Y. Liu, B. Huang, and B. T. Liu, "A new potassium dual-ion hybrid supercapacitor based on battery-type  $\text{Ni}(\text{OH})_2$  nanotube arrays and pseudocapacitor-type  $\text{V}_2\text{O}_5$ -anchored carbon nanotubes electrodes," *J Colloid Interface Sci*, vol. 607, no. Pt 1, pp. 462-469, Feb 2022.
